# Supplementary material for: Role of Selective Digestive Decontamination in the Prevention of Ventilator-Associated Pneumonia in COVID-19 Patients: A Pre-Post Observational Study
Source: MDPI journal article supplement (doi:10.3390/jcm12041432), 2023-02-10
Supplement: s1 [file s1]

# Supplementary Materials

**Table S1.** Incidence of ventilator-associated pneumonia and bloodstream infection in the different waves of the pandemic.

| Period      | Date                         | Patients Included | VAP (n; %) | Blood Stream Infection (n; %) |
|-------------|------------------------------|-------------------|------------|-------------------------------|
| First wave  | February–June 2020           | 80                | 27 (33.7)  | 12 (15.0)                     |
| Second Wave | September 2020–February 2021 | 104               | 39 (37.5)  | 22 (21.1)                     |
| Third Wave  | March–July 2021              | 93                | 27 (29.0)  | 20 (21.5)                     |
| Fourth wave | October 2022–March 2022      | 71                | 20 (28.2)  | 17 (23.9)                     |

VAP: ventilator associated pneumonia.

**Table S2.** Secondary analysis in patients matched 1:1 using the individual propensity for receiving selective digestive decontamination. Demographics, comorbidities, severity scores, and laboratory at ICU admission in all the patients included in the secondary analysis and in patients with or without selective digestive decontamination. The use of steroids during ICU stay and of tocilizumab before and during ICU stay are also reported.

|                                                        | All Patients (n = 162) | No SDD (n = 81) | SDD (n = 81)    | p Value |
|--------------------------------------------------------|------------------------|-----------------|-----------------|---------|
| Age (years; median, IQR)                               | 66 (57–71)             | 66 (55–71)      | 64 (58–72)      | 0.689   |
| Sex, male (n, %)                                       | 116 (71.6)             | 58 (71.6)       | 58 (71.6)       | 1.000   |
| BMI (kg/m <sup>2</sup> ; median, IQR)                  | 30 (27–34)             | 30 (27–35)      | 31 (26–33)      | 0.592   |
| Comorbidities                                          |                        |                 |                 |         |
| Diabetes (n, %)                                        | 40 (24.7)              | 20 (24.7)       | 20 (24.7)       | 1.000   |
| Hypertension (n, %)                                    | 64 (39.5)              | 32 (39.5)       | 32 (39.5)       | 1.000   |
| Immunosuppression (n, %)                               | 30 (18.5)              | 15 (18.5)       | 15 (18.5)       | 1.000   |
| SAPSII (median, IQR)                                   | 35 (30–40)             | 35 (30–39)      | 33 (29–42)      | 0.718   |
| D-dimer (ng/ml; median, IQR)                           | 1560 (888–4299)        | 1510 (890–2690) | 1605 (888–6970) | 0.446   |
| Platelet count (10 <sup>9</sup> /L; median, IQR)       | 218 (155–285)          | 205 (147–274)   | 220 (171–290)   | 0.198   |
| PaO <sub>2</sub> /FiO <sub>2</sub> (mmHg; median, IQR) | 92 (73–111)            | 97 (79–117)     | 88 (71–109)     | 0.114   |
| Steroids (n, %)                                        | 162 (100.0)            | 81 (100.0)      | 81 (100.0)      | 1.000   |
| Tocilizumab (n, %)                                     | 138 (85.2)             | 68 (84.0)       | 70 (86.4)       | 0.658   |

SDD: selective digestive decontamination; Body Mass Index: BMI; SAPSII: Simplified Acute Physiology Score II.

**Table S3.** Secondary analysis in patients matched 1:1 using the individual propensity for receiving selective digestive decontamination. Ventilator-associated pneumonia and other infections during intensive care stay and hospital mortality in all the patients and in patients receiving and not receiving selective digestive decontamination.

|                                                      | No SDD (n = 81) | SDD (n = 81) | p Value |
|------------------------------------------------------|-----------------|--------------|---------|
| VAP (n, %)                                           | 31 (38.3)       | 22 (27.2)    | 0.132   |
| Early VAP (n, %)                                     | 7 (8.6)         | 6 (7.4)      | 0.772   |
| Late VAP (n, %)                                      | 24 (29.6)       | 16 (19.8)    | 0.145   |
| VAP Onset time after invasive MV (days; median, IQR) | 7 (5–12)        | 9 (5–18)     | 0.541   |
| VAP Gram-stained microorganisms                      |                 |              | 0.443   |
| Gram-positive (n, %)                                 | 15 (46.9)       | 8 (36.4)     |         |
| Gram-negative (n, %)                                 | 17 (53.1)       | 14 (63.6)    |         |
| VAP MDR microorganisms (n, %)                        | 11 (35.5)       | 7 (31.8)     | 0.781   |
| CMV blood reactivation (n, %)                        | 27 (33.3)       | 28 (34.6)    | 0.868   |
| Probable Invasive Pulmonary Aspergillosis (n, %)     | 22 (27.2)       | 24 (29.6)    | 0.727   |
| Invasive MV length (days; median, IQR)               | 11 (5–25)       | 10 (5–33)    | 0.992   |
| Hospital Length of stay (days; median, IQR)          | 27 (18–45)      | 30 (18–47)   | 0.874   |
| Hospital mortality (n, %)                            | 40 (50.6)       | 45 (58.4)    | 0.327   |

SDD: selective digestive decontamination; VAP: ventilator associated pneumonia; MDR: multidrug-resistant; CMV: cytomegalovirus; MV: mechanical ventilation.
